# Supplementary material for: A model-based framework for chronic hepatitis C prevalence estimation
Source: PubMed Central journal article supplement (PMC6874092; doi:10.1371/journal.pone.0225366), 2019-11-21
Supplement: pone.0225366.s001.pdf [file pone.0225366.s001.pdf]

| <b>Parameter</b> | <b>Transition, reference</b>              | <b>Annual probability mean (range)</b> |
|------------------|-------------------------------------------|----------------------------------------|
| $q_{chr}$        | Acute $\rightarrow$ F0, [10]              | 0.70 (0.55-0.85)                       |
| $q_{01}$         | F0 $\rightarrow$ F1, [4]                  | 0.117 (0.104 - 0.130)                  |
| $q_{12}$         | F1 $\rightarrow$ F2, [4]                  | 0.085 (0.075 - 0.096)                  |
| $q_{23}$         | F2 $\rightarrow$ F3, [4]                  | 0.120 (0.109 - 0.133)                  |
| $q_{34}$         | F3 $\rightarrow$ F4, [4]                  | 0.116 (0.104 - 0.129)                  |
| $d_{DC}$         | F4 $\rightarrow$ DC, [12]                 | 0.035 (0.027 - 0.043)                  |
| $d_{DC-SVR}$     | F4 (SVR) $\rightarrow$ DC, [12]           | 0.002 (0.0001 - 0.005)                 |
| $a_1$            | HCC $\rightarrow$ LT, [23]                | 0.033 (0.017 - 0.049)                  |
| $a_2$            | HCC $\rightarrow$ LD, [24]                | 0.411 (0.31 - 0.51)                    |
| $a_3$            | DC $\rightarrow$ LT, [23]                 | 0.033 (0.017 - 0.049)                  |
| $a_4$            | DC $\rightarrow$ LD, [25]                 | 0.216 (0.162 - 0.27)                   |
| $a_5$            | LT $\rightarrow$ LD within one year, [26] | 0.142 (0.124 - 0.159)                  |
| $a_6$            | LT $\rightarrow$ LD after one year, [26]  | 0.034 (0.024 - 0.043)                  |

**S1 Table: Literature-derived model parameters.** Annual probabilities of progression to CHC, progression between fibrosis stages, progression to DC, and advanced liver disease progression.
