# Supplementary material for: A model-based framework for chronic hepatitis C prevalence estimation
Source: PubMed Central journal article supplement (PMC6874092; doi:10.1371/journal.pone.0225366), 2019-11-21
Supplement: pone.0225366.s002.pdf [file pone.0225366.s002.pdf]

| <b>Annual probability of treatment <math>t_i</math></b> |                    |                      |                        |
|---------------------------------------------------------|--------------------|----------------------|------------------------|
| <b>Fibrosis stage</b>                                   | <b>Genotype 1</b>  | <b>Genotypes 2,3</b> | <b>Genotypes 4,5,6</b> |
| F0                                                      | 0.03 (0.02 - 0.04) | 0.04 (0.03 - 0.06)   | 0.05 (0.03 - 0.06)     |
| F1                                                      | 0.05 (0.03 - 0.06) | 0.07 (0.05 - 0.11)   | 0.05 (0.03 - 0.06)     |
| F2                                                      | 0.05 (0.03 - 0.06) | 0.07 (0.05 - 0.11)   | 0.05 (0.03 - 0.06)     |
| F3                                                      | 0.05 (0.03 - 0.08) | 0.07 (0.05 - 0.12)   | 0.05 (0.03 - 0.06)     |
| F4                                                      | 0.06 (0.04 - 0.10) | 0.06 (0.04 - 0.10)   | 0.06 (0.04 - 0.09)     |

**S2 Table: Annual probabilities of treatment adoption by fibrosis stage and viral genotype for the population of Canada.**
