# Supplementary material for: A model-based framework for chronic hepatitis C prevalence estimation
Source: PubMed Central journal article supplement (PMC6874092; doi:10.1371/journal.pone.0225366), 2019-11-21
Supplement: pone.0225366.s003.pdf [file pone.0225366.s003.pdf]

| <b>Birth cohort</b>          | <b>Percentage of HCC cases induced by CHC<br/>(<math>100 \times c_{HCC}</math>)</b> |
|------------------------------|-------------------------------------------------------------------------------------|
| Births before 1945           | 13 (7-20)                                                                           |
| Births between 1945 and 1964 | 46 (23-69)                                                                          |
| Births after 1964            | 6 (4-8)                                                                             |

**S3 Table: Percentage of HCC cases induced by CHC.**
