# Supplementary material for: A model-based framework for chronic hepatitis C prevalence estimation
Source: PubMed Central journal article supplement (PMC6874092; doi:10.1371/journal.pone.0225366), 2019-11-21
Supplement: pone.0225366.s004.pdf [file pone.0225366.s004.pdf]

| Year<br>$t$ | Birth years < 1945               |                                     |                                   | 1945 ≤ Birth years ≤ 1964        |                                     |                                   | Birth years ≥ 1965               |                                     |                                   |
|-------------|----------------------------------|-------------------------------------|-----------------------------------|----------------------------------|-------------------------------------|-----------------------------------|----------------------------------|-------------------------------------|-----------------------------------|
|             | HCC<br>diagnoses<br>$z_{HCC}(t)$ | Hep C<br>diagnoses<br>$z_{hepC}(t)$ | Population<br>(×1000)<br>$p_n(t)$ | HCC<br>diagnoses<br>$z_{HCC}(t)$ | Hep C<br>diagnoses<br>$z_{hepC}(t)$ | Population<br>(×1000)<br>$p_n(t)$ | HCC<br>diagnoses<br>$z_{HCC}(t)$ | Hep C<br>diagnoses<br>$z_{hepC}(t)$ | Population<br>(×1000)<br>$p_n(t)$ |
| 0           | 730                              | 2974                                | 6385                              | 160                              | 10340                               | 9460                              | 30                               | 5711                                | 14434                             |
| 1           | 796                              | 2639                                | 6217                              | 196                              | 9390                                | 9426                              | 38                               | 5708                                | 14917                             |
| 2           | 828                              | 2305                                | 6049                              | 253                              | 8870                                | 9390                              | 34                               | 5619                                | 15452                             |
| 3           | 833                              | 1865                                | 5882                              | 281                              | 8551                                | 9373                              | 26                               | 5493                                | 15967                             |
| 4           | 834                              | 1448                                | 5678                              | 279                              | 7938                                | 9408                              | 52                               | 5374                                | 16410                             |
| 5           | 845                              | 1115                                | 5444                              | 355                              | 7655                                | 9506                              | 35                               | 5616                                | 16838                             |
| 6           | 889                              | 987                                 | 5276                              | 452                              | 6562                                | 9467                              | 29                               | 5411                                | 17344                             |
| 7           | 907                              | 897                                 | 5109                              | 505                              | 5889                                | 9415                              | 53                               | 5187                                | 17884                             |
| 8           | 939                              | 890                                 | 4929                              | 598                              | 5626                                | 9369                              | 68                               | 5470                                | 18420                             |
| 9           | 949                              | 861                                 | 4717                              | 612                              | 5321                                | 9394                              | 64                               | 5660                                | 18957                             |
| 10          | 910                              | 739                                 | 4475                              | 700                              | 4807                                | 9479                              | 65                               | 5619                                | 19489                             |
| 11          | 850                              | 737                                 | 4303                              | 728                              | 4364                                | 9421                              | 87                               | 5435                                | 20081                             |
| 12          | 896                              | 759                                 | 4121                              | 849                              | 3873                                | 9340                              | 90                               | 5415                                | 20666                             |
| 13          | 888                              | 758                                 | 3944                              | 916                              | 3545                                | 9274                              | 96                               | 5832                                | 21298                             |
| 14          | 805                              | 801                                 | 3737                              | 940                              | 3356                                | 9278                              | 115                              | 6161                                | 21891                             |

**S4 Table: Diagnosis data for model calibration.** HCC diagnoses, hepatitis C diagnoses, and population, by cohort, for Canada, 1999-2013. Year  $t = 0$  corresponds to year 1999, year  $t = 14$  corresponds to year 2013.
