# Supplementary material for: A model-based framework for chronic hepatitis C prevalence estimation
Source: PubMed Central journal article supplement (PMC6874092; doi:10.1371/journal.pone.0225366), 2019-11-21
Supplement: pone.0225366.s005.pdf [file pone.0225366.s005.pdf]

| Fibrosis stage $i$ | Fibrosis distribution $z_{Fi}$ (%) |                           |                    |
|--------------------|------------------------------------|---------------------------|--------------------|
|                    | Births years < 1945                | 1945 ≤ Birth years ≤ 1964 | Birth years ≥ 1965 |
| 0                  | 0.5                                | 4.0                       | 13.5               |
| 1                  | 20.0                               | 30.5                      | 35.8               |
| 2                  | 20.0                               | 30.5                      | 35.8               |
| 3                  | 30.5                               | 20.5                      | 9.5                |
| 4                  | 29.0                               | 14.5                      | 5.5                |

**S5 Table: Distribution of fibrosis levels for each birth cohort.**
