# Supplementary material for: A model-based framework for chronic hepatitis C prevalence estimation
Source: PubMed Central journal article supplement (PMC6874092; doi:10.1371/journal.pone.0225366), 2019-11-21
Supplement: pone.0225366.s006.pdf [file pone.0225366.s006.pdf]

| <b>Parameter groups</b>                | <b>Model parameters</b>                                  |
|----------------------------------------|----------------------------------------------------------|
| CHC progression annual probability     | $q_{01}, q_{12}, q_{23}, q_{34}$                         |
| Treatment annual probability           | $t_0, t_1, t_2, t_3, t_4$                                |
| SVR annual probability                 | $s_0, s_1, s_2, s_3, s_4$                                |
| Diagnosis annual probability           | $d_{early_0}, d_{early_{14}}, d_{late_0}, d_{late_{14}}$ |
| Progression to HCC annual probability  | $d_{HCC_0}, d_{HCC_{14}}$                                |
| Progression to DC annual probability   | $d_{DC}, d_{DC_{SVR}}$                                   |
| Liver transplant annual probability    | $a_1, a_3$                                               |
| Liver related death annual probability | $a_2, a_4, a_5, a_6$                                     |
| Number of new infections               | $u_0, u_{14}$                                            |

**S6 Table: Parameter groups perturbed in one-way sensitivity analysis.**
