# Supplementary material for: A model-based framework for chronic hepatitis C prevalence estimation
Source: PubMed Central journal article supplement (PMC6874092; doi:10.1371/journal.pone.0225366), 2019-11-21
Supplement: pone.0225366.s008.pdf [file pone.0225366.s008.pdf]

## S2 Appendix - Construction of the model likelihood function

The data we used in model calibration can be categorized into: time-series data  $z_{ts}(t) = [z_{HCC}(t) \ z_{hepC}(t)]'$ , (for  $t = 0, \dots, 14$ ) and liver fibrosis distribution data  $z_F = [z_{F_0}, \dots, z_{F_4}]'$ . We let  $\mathbf{z} = [z_{ts}(0)', \dots, z_{ts}(14)', z_F']'$ .

The likelihood function  $L(M|\mathbf{z}, V)$  is the probability of observing the data vector  $\mathbf{z}$  given the parameter vector of unknown parameters  $M$  and uncertain parameters  $V$ . This likelihood function can be decomposed into a product of likelihood functions for the time series data ( $L_{ts}(M|z(0), \dots, z(14), V)$ ) and for the fibrosis distribution data ( $L_F(M|z_{F_0}, \dots, z_{F_4}, V)$ ). Formally:

$$L(M|\mathbf{z}, V) = L_F(M|z_{F_0}, \dots, z_{F_4}, V) L_{ts}(M|z_{ts}(0), \dots, z_{ts}(14), V)$$

To construct  $L_{ts}$ , we make use of the definitions of the observables in (6) and (9). We assume that, for each  $t$ ,  $z_{HCC}(t)$  follows a Poisson distribution with mean  $y_{HCC}(t)$  and  $z_{hepC}(t)$  follows another Poisson distribution with mean  $y_{hepC}(t)$ . The number of HCC diagnoses  $z_{HCC}(t)$  conditional upon  $y_{HCC}(t)$  can be assumed to be independent of the number of diagnoses  $z_{hepC}(t)$  conditional upon  $y_{hepC}(t)$ . For the time series data, the likelihood function is

$$L_{ts}(M|z(0), \dots, z(14), V) = \prod_{t=0}^{14} \left( L_{HCC}(y_{HCC}(t)|z_{HCC}(t), V) \cdot L_{hepC}(y_{hepC}(t)|z_{hepC}(t), V) \right)$$

where, for  $j = HCC, hepC$ ,  $L_j(y_j(t)|z_j(t), V) = \frac{y_j(t)^{z_j(t)}}{z_j(t)!} \exp(-y_j(t))$ .

To construct  $L_F$ , we use the definitions of the observables in (7) and (8). Let  $Y_{CHC} = \sum_{t=0}^{14} y_{CHC}(t)$  and let  $Y_{F_i} = \sum_{t=0}^{14} y_{F_i}(t)$  for  $i = 0, 1, 2, 3, 4$ . Given  $Y_{CHC}$  and  $z_{F_i}$  from S5 Table, we expect that, on average,  $z_{F_i} Y_{CHC}$  ( $\pm 25\%$ ) CHC diagnoses at fibrosis level  $F_i$  over the years  $t = 0, \dots, 14$ . The model, conditioned on  $M$  and  $V$ , estimates  $Y_{F_i}$  CHC diagnoses at fibrosis level  $F_i$  over the years  $t = 0, \dots, 14$ . We model  $Y_{F_i}$  as being normally distributed around a mean of  $z_{F_i} Y_{CHC}$  with variance  $\sigma_{F_i}^2$ . Taking the  $\pm 25\%$  error in the mean

as being equal to two standard deviations, we set  $\sigma_{F_i} = \frac{1}{8} z_{F_i} Y_{CHC}$ . The contribution to the model likelihood arising from fibrosis distribution data therefore satisfies

$$L_F(M|z_{F_0}, \dots, z_{F_4}, V) \propto \prod_{i=0}^4 \exp\left(-\left(\frac{Y_{F_i} - z_{F_i} Y_{CHC}}{2\sigma_{F_i}^2}\right)^2\right).$$
