# Supplementary material for: A model-based framework for chronic hepatitis C prevalence estimation
Source: PubMed Central journal article supplement (PMC6874092; doi:10.1371/journal.pone.0225366), 2019-11-21
Supplement: pone.0225366.s010.pdf [file pone.0225366.s010.pdf]

**S4 Appendix - Mean estimates of total numbers of CHC cases and undiagnosed CHC cases.**

| <b>Estimated mean total number of CHC cases in Canada, 1999-2013, by birth cohort</b> |                              |                                  |                              |
|---------------------------------------------------------------------------------------|------------------------------|----------------------------------|------------------------------|
| <b>Year</b>                                                                           | <b>Birth years &lt; 1945</b> | <b>1945 ≤ Birth years ≤ 1964</b> | <b>Birth years &gt; 1964</b> |
| 1999                                                                                  | 54341                        | 145367                           | 31916                        |
| 2000                                                                                  | 50057                        | 139972                           | 34196                        |
| 2001                                                                                  | 48098                        | 138876                           | 37949                        |
| 2002                                                                                  | 46123                        | 137389                           | 41797                        |
| 2003                                                                                  | 44120                        | 135555                           | 45727                        |
| 2004                                                                                  | 42127                        | 133401                           | 49739                        |
| 2005                                                                                  | 40164                        | 130965                           | 53834                        |
| 2006                                                                                  | 38192                        | 128276                           | 58085                        |
| 2007                                                                                  | 36236                        | 125374                           | 62420                        |
| 2008                                                                                  | 34311                        | 122288                           | 66832                        |
| 2009                                                                                  | 32434                        | 119051                           | 71327                        |
| 2010                                                                                  | 30626                        | 115689                           | 75898                        |
| 2011                                                                                  | 28854                        | 112234                           | 80642                        |
| 2012                                                                                  | 27134                        | 108712                           | 85459                        |
| 2013                                                                                  | 25472                        | 105143                           | 90337                        |

| <b>Estimated mean total number of undiagnosed CHC cases in Canada, 1999-2013, by birth cohort</b> |                              |                                  |                              |
|---------------------------------------------------------------------------------------------------|------------------------------|----------------------------------|------------------------------|
| <b>Year</b>                                                                                       | <b>Birth years &lt; 1945</b> | <b>1945 ≤ Birth years ≤ 1964</b> | <b>Birth years &gt; 1964</b> |
| 1999                                                                                              | 34988                        | 118845                           | 24310                        |
| 2000                                                                                              | 31003                        | 107681                           | 22494                        |
| 2001                                                                                              | 27526                        | 97345                            | 21355                        |
| 2002                                                                                              | 24464                        | 87676                            | 20677                        |
| 2003                                                                                              | 21752                        | 78646                            | 20365                        |
| 2004                                                                                              | 19360                        | 70233                            | 20358                        |
| 2005                                                                                              | 17251                        | 62423                            | 20606                        |
| 2006                                                                                              | 15369                        | 55200                            | 21097                        |
| 2007                                                                                              | 13694                        | 48551                            | 21773                        |
| 2008                                                                                              | 12202                        | 42461                            | 22610                        |
| 2009                                                                                              | 10875                        | 36917                            | 23593                        |
| 2010                                                                                              | 9701                         | 31901                            | 24708                        |
| 2011                                                                                              | 8650                         | 27395                            | 25971                        |
| 2012                                                                                              | 7711                         | 23376                            | 27345                        |
| 2013                                                                                              | 6875                         | 19818                            | 28824                        |
