# Supplementary material for: A model-based framework for chronic hepatitis C prevalence estimation
Source: PubMed Central journal article supplement (PMC6874092; doi:10.1371/journal.pone.0225366), 2019-11-21
Supplement: pone.0225366.s011.pdf [file pone.0225366.s011.pdf]

**S5 Appendix - Prior and posterior distributions of year 2013 number of new infections and probabilities of diagnosis.**

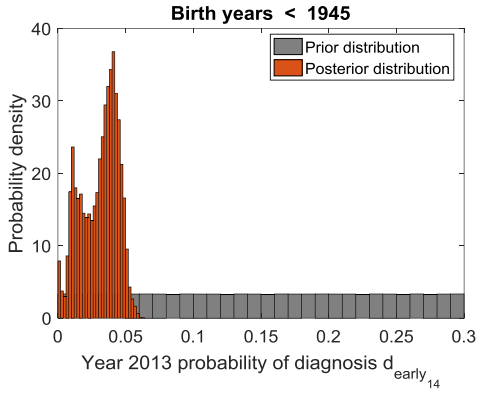

**A** – Year 2013 prior and posterior distributions of CHC diagnosis probability among patients in fibrosis stages F0 and F1 ( $d_{early_{14}}$ ) born before 1945.

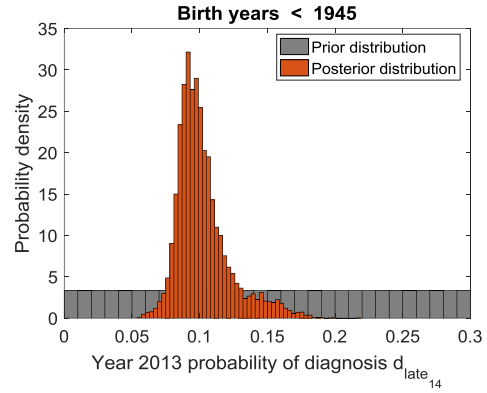

**B** – Year 2013 prior and posterior distribution of CHC diagnosis probability among patients in fibrosis stages F2-F4 ( $d_{late_{14}}$ ) born before 1945.

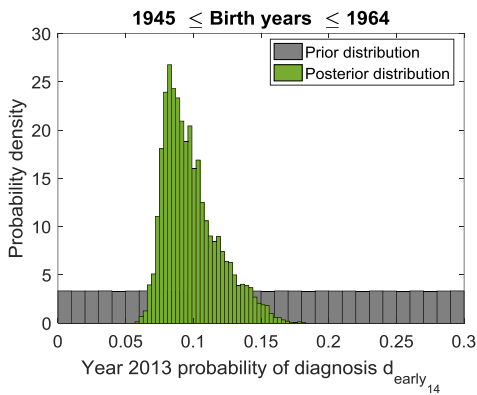

**C** – Year 2013 prior and posterior distributions of CHC diagnosis probability among patients in fibrosis stages F0 and F1 ( $d_{early_{14}}$ ) born in 1945-1964.

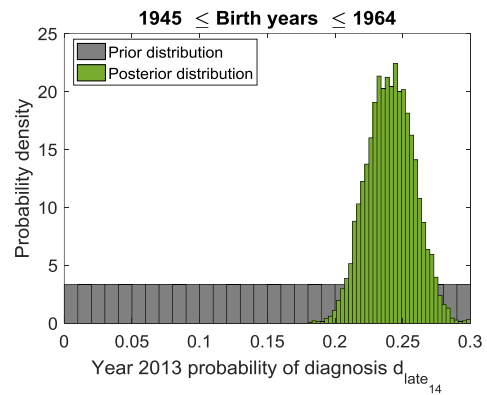

**D** – Year 2013 prior and posterior distributions of CHC diagnosis probability among patients in fibrosis stages F2-F4 ( $d_{late_{14}}$ ) born in 1945-1964.

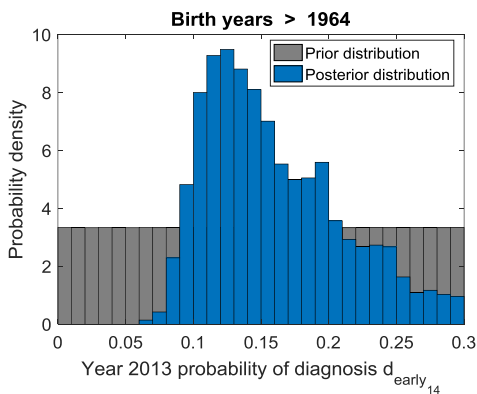

**E** – Year 2013 prior and posterior distributions of CHC diagnosis probability among patients in fibrosis stages F0 and F1 ( $d_{early_{14}}$ ) born after 1964.

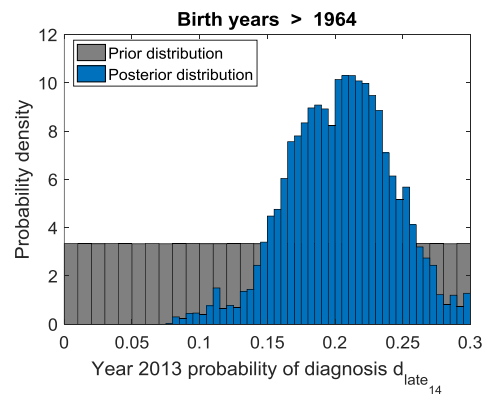

**F** – Year 2013 prior and posterior distributions of CHC diagnosis probability among patients in fibrosis stages F2-F4 ( $d_{late_{14}}$ ) born after 1964.

**S5 Appendix - continued**

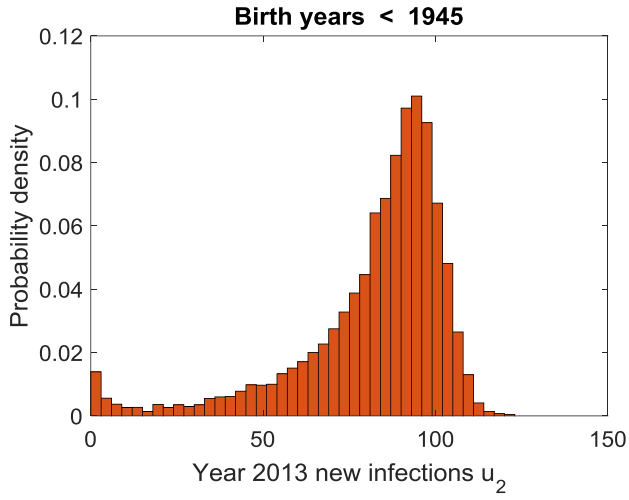

A - Year 2013 posterior distribution of number of new infections among individuals born before 1945. Prior distribution is uniform with range  $[0, 2 \times 10^4]$

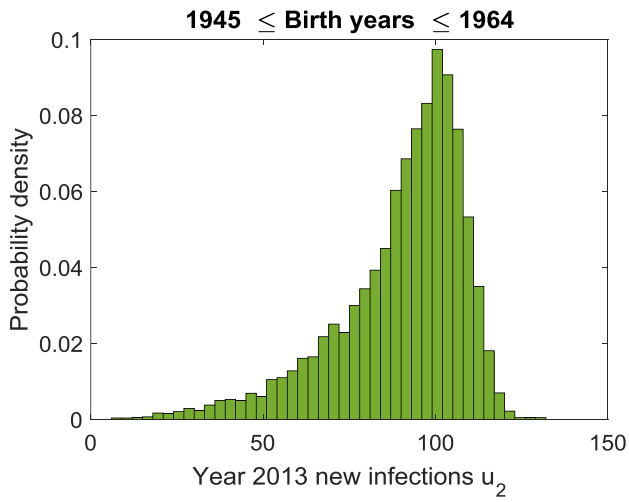

B - Year 2013 posterior distribution of number of new infections among individuals born in 1945-1964. Prior distribution is uniform with range  $[0, 2 \times 10^4]$

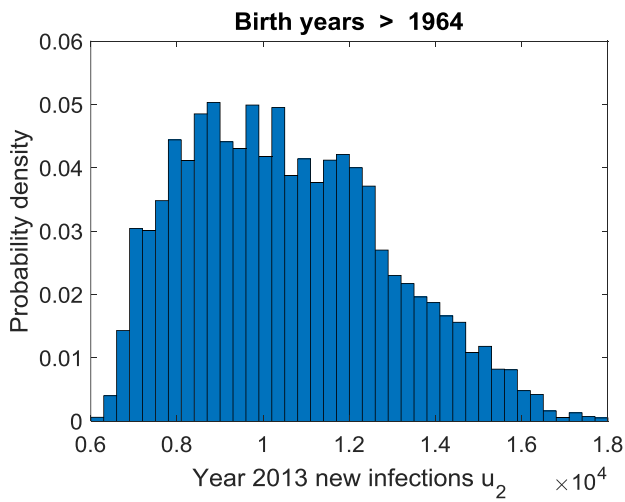

C - Year 2013 posterior distribution of number of new infections among individuals born after 1964. Prior distribution is uniform with range  $[0, 2 \times 10^4]$
